# Supplementary material
Source: publisher site journal article supplement (https://www.dovepress.com/article/589598)
Supplement: Supplementary file 1 [file 589598_Supplementary%20File%201%20Searching%20Strategy.docx]

**Supplementary File 1. Searching Strategy**

| **Database** | **Search Strategy** |
| --- | --- |
| **PubMed** | (("Thalassemia"[MeSH Terms] OR "Thalassemia"[Title/Abstract] OR "Thalassemia Major"[Title/Abstract] OR "Transfusion Dependent Thalassemia"[Title/Abstract] OR "beta-Thalassemia"[Title/Abstract] OR "Cooley Anemia"[Title/Abstract])) |
| (("Suicidal Ideation"[MeSH Terms] OR "suicidal ideation"[Title/Abstract] OR "suicide risk"[Title/Abstract] OR "self-abuse"[Title/Abstract] OR "suicidal behavior"[Title/Abstract] OR "suicide attempt"[Title/Abstract] OR "thoughts of death"[Title/Abstract])) |
| (("Adolescent"[MeSH Terms] OR "adolescents"[Title/Abstract] OR "teenagers"[Title/Abstract] OR "youth"[Title/Abstract] OR "thalassemia treatment"[Title/Abstract] OR "mental health in adolescents"[Title/Abstract] OR "mental health interventions"[Title/Abstract])) |
| ("Psychological distress"[MeSH Terms] OR "psychological distress"[Title/Abstract] OR "self-harm"[Title/Abstract] OR "iron overload"[Title/Abstract] OR "quality of life"[Title/Abstract]) |
| **Scopus** | (TITLE-ABS-KEY ("Thalassemia" OR "Thalassemia Major" OR "Transfusion Dependent Thalassemia" OR "beta-Thalassemia" OR "Cooley Anemia")) |
| (TITLE-ABS-KEY ("Suicidal Ideation" OR "Suicide Risk" OR "Suicidal Behavior" OR "Suicide Attempt" OR "thoughts of death" OR "self-abuse")) |
| (TITLE-ABS-KEY ("Adolescents" OR "Teenagers" OR "Youth" OR "Child" OR "early adolescence")) |
| (TITLE-ABS-KEY ("Psychological distress" OR "self-harm" OR "iron overload" OR "quality of life")) |
| **CINAHL** | ((MH "Thalassemia+") OR TX ("Thalassemia" OR "Thalassemia Major" OR "Transfusion Dependent Thalassemia" OR "beta-Thalassemia" OR "Cooley Anemia")) |
| ((MH "Suicidal Ideation") OR TX ("Suicidal Ideation" OR "Suicide Risk" OR "Self-Abuse" OR "Suicidal Behavior" OR "Suicide Attempt" OR "thoughts of death")) |
| ((MH "Adolescence+") OR TX ("Adolescents" OR "Teenagers" OR "Youth" OR "Thalassemia Treatment" OR "Mental Health in Adolescents" OR "Mental Health Interventions")) |
| ((MH "Psychological distress") OR TX ("self-harm" OR "iron overload" OR "quality of life")) |
